# Supplementary material for: Modeling CIC::DUX4 sarcoma reveals oncogene-mediated MHCI-dependent immune evasion
Source: Research Square preprint supplement (doi:10.21203/rs.3.rs-6516041/v1), 2025-05-07
Supplement: Supplementary file 1 [file 1c4e97fad7c0f8fdfcf18196.docx]

Supplementary Table 1

**Target gene Primer sequence**

Actin-ß Fwd: 5'-GGCTGTATTCCCCTCCATCG-3'

Rev: 5'-CCAGTTGGTAACAATGCCATGT-3'

Gapdh Fwd: 5'-GAAGGTGAAGGTCGGAGT-3'

Rev: 5'-GAAGATGGTGATGGGATTTTC-3'

CIC::DUX4 Fwd: 5'-CTCACCCAGCTCGGACTC-3'

Rev: 5'-CAGGGGAGTGCAGACCA-3'

Etv1 Fwd: 5'-TCCTGGCTCATCCAAGCAGAAC-3'

Rev: 5'-CGGTACATTCCAGGCTCTTGCT-3'

Etv4 Fwd: 5'-CCACCAGGATCAAGAAGGAA-3'

Rev: 5'-CCCTGAGGAGATGTGAAGGA-3'

Etv5 Fwd: 5'-AGCCCACCATGTATCGAGAG-3'

Rev: 5'-TGCATGATGCCCTTTTCATA-3'

Ccne1 Fwd: 5'-TCCACGCATGCTGAATTATC-3'

Rev: 5'-TTGCAAGACCCAGATGAAGA-3'

Ccne2 Fwd: 5'-AAAAAGTCTTGGGCAAGGTAAA-3'

Rev: 5'-GCATTCTGACCTGGAACCAC-3'

Ccnd1 Fwd: 5'-GCGTACCCTGACACCAATCTC-3'

Rev: 5'-CTCCTCTTCGCACTTCTGCTC-3'

Ccnd2 Fwd: 5'CAAGGAGGGACTCCATCTACGC-3'

Rev: 5'-AGAGGAGTCCCGTGTCAGTAGG-3'

Cdk2 Fwd: 5'-CCTGCTTATCAATGCAGAGGG-3'

Rev: 5'-TGCGGGTCACCATTTCAGC-3'

p15 Fwd: 5'-AGATCCCAACGCCCTGAAC-3'

Rev: 5'-CCCATCATCATGACCTGGATT-3'

p16 Fwd: 5'-CCCAACGCCCCGAACT-3'

Rev: 5'-GCAGAAGAGCTGCTACGTGAA-3'

p19 Fwd: 5'-GCCGGCAAATGATCATAGAG-3'

Rev: 5'-CAGCAAGAGCTGGATCAGAA-3'

p21 Fwd: 5'-GTCAGGCTGGTCTGCCTCCG-3'

Rev: 5'-CGGTCCCGTGGACAGGAGCAG-3'

c-Myc Fwd: 5'-GCGACTCTGAAGAAGAGCAAG-3'

Rev: 5'-GCCTCGGGATGGAGATGAG-3'

Rb1 Fwd: 5'-CTGGCCAGGCTTGAGTTAGA-3'

Rev: 5'-GATGCAGATGCCCCAGAGTT-3'

H2-D1 Fwd: 5'-GTGCTGCAGAGCATTACAAG-3'

Rev: 5'-ATGTAAGAGTCAGTGGACGG-3'

H2-K1 Fwd: 5'-ATACCTGAAGAACGGGAACG-3'

Rev: 5'-TCCAAGGACAACCAGAACAG-3'

ß2m Fwd: 5'-TTCTGGTGCTTGTCTCACTGA-3'

Rev: 5'-CAGTATGTTCGGCTTCCCATTC-3'
