# Supplementary figures and images for: Modeling CIC::DUX4 sarcoma reveals oncogene-mediated MHCI-dependent immune evasion
Source: Research Square preprint supplement (doi:10.21203/rs.3.rs-6516041/v1), 2025-05-07

Supplementary Fig. 5

A

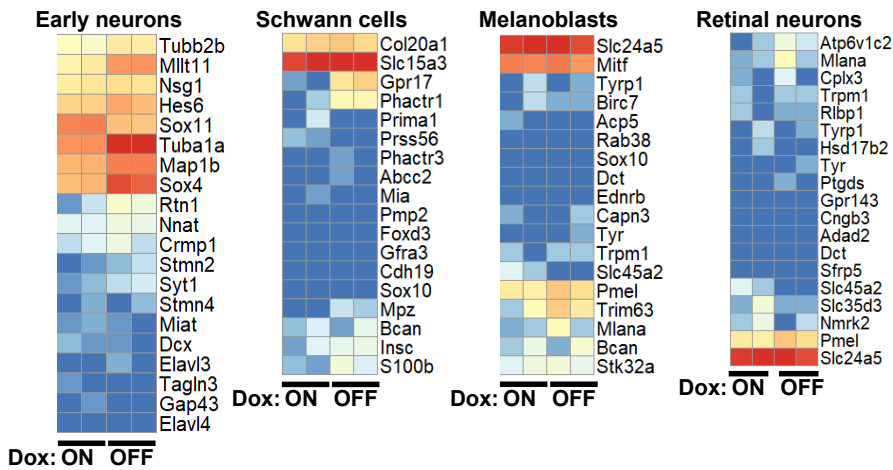

B

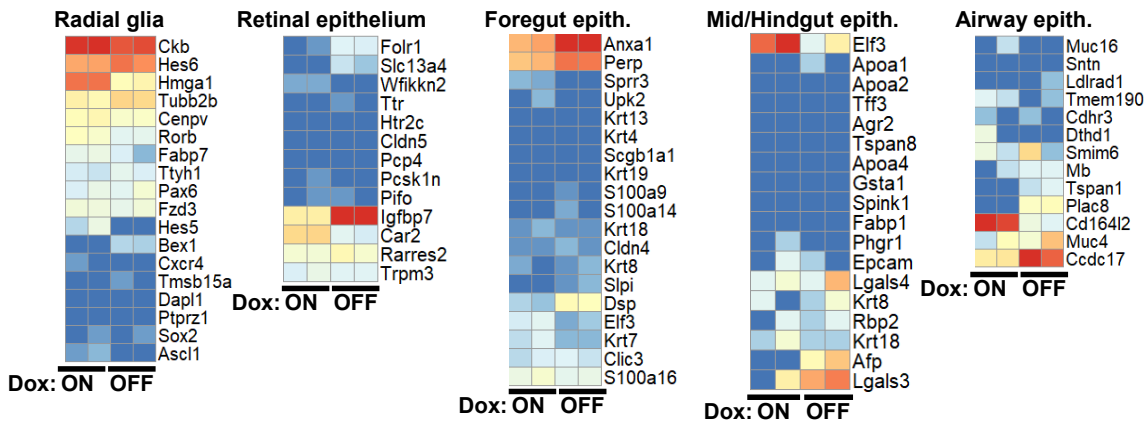

C

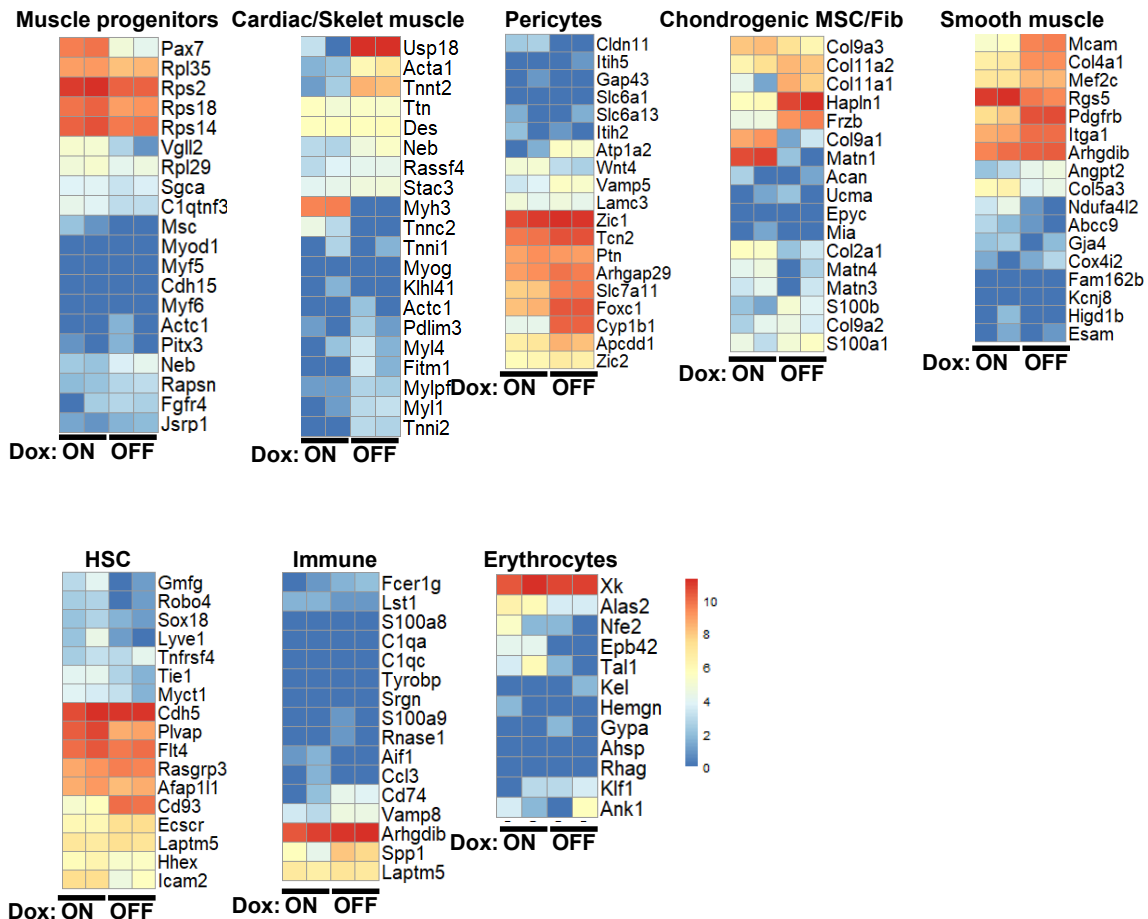

Supplement: Supplementary file 1 [file 96847fabba04f3002e591510.pdf]
